# Supplementary material for: Liver Transplantation for Pediatric Hepatocellular Carcinoma: A Systematic Review
Source: MDPI journal article supplement (doi:10.3390/cancers14051294), 2022-03-02
Supplement: s1 [file s1]

# Liver Transplantation for Pediatric Hepatocellular Carcinoma: A Systematic Review

Christos D. Kakos, Ioannis A. Ziogas, Charikleia D. Demiri, Stepan M. Esagian,  
Konstantinos P. Economopoulos, Dimitrios Moris, Georgios Tsoulfas and Sophoclis P. Alexopoulos

**Table S1.** PRISMA (Preferred Reporting Items for Systematic Reviews and Meta-analysis) Checklist.

| Section/topic             | # | Checklist item                                                                                                                                                                                                                                                                                              | Reported on page # |
|---------------------------|---|-------------------------------------------------------------------------------------------------------------------------------------------------------------------------------------------------------------------------------------------------------------------------------------------------------------|--------------------|
| <b>TITLE</b>              |   |                                                                                                                                                                                                                                                                                                             |                    |
| Title                     | 1 | Identify the report as a systematic review, meta-analysis, or both.                                                                                                                                                                                                                                         | 1                  |
| <b>ABSTRACT</b>           |   |                                                                                                                                                                                                                                                                                                             |                    |
| Structured summary        | 2 | Provide a structured summary including, as applicable: background; objectives; data sources; study eligibility criteria, participants, and interventions; study appraisal and synthesis methods; results; limitations; conclusions and implications of key findings; systematic review registration number. | 1                  |
| <b>INTRODUCTION</b>       |   |                                                                                                                                                                                                                                                                                                             |                    |
| Rationale                 | 3 | Describe the rationale for the review in the context of what is already known.                                                                                                                                                                                                                              | 2                  |
| Objectives                | 4 | Provide an explicit statement of questions being addressed with reference to participants, interventions, comparisons, outcomes, and study design (PICOS).                                                                                                                                                  | 2                  |
| <b>METHODS</b>            |   |                                                                                                                                                                                                                                                                                                             |                    |
| Protocol and registration | 5 | Indicate if a review protocol exists, if and where it can be                                                                                                                                                                                                                                                | 2                  |

|                                    |    |                                                                                                                                                                                                        |     |
|------------------------------------|----|--------------------------------------------------------------------------------------------------------------------------------------------------------------------------------------------------------|-----|
|                                    |    | accessed (e.g., Web address), and, if available, provide registration information including registration number.                                                                                       |     |
| Eligibility criteria               | 6  | Specify study characteristics (e.g., PICOS, length of follow-up) and report characteristics (e.g., years considered, language, publication status) used as criteria for eligibility, giving rationale. | 2   |
| Information sources                | 7  | Describe all information sources (e.g., databases with dates of coverage, contact with study authors to identify additional studies) in the search and date last searched.                             | 3   |
| Search                             | 8  | Present full electronic search strategy for at least one database, including any limits used, such that it could be repeated.                                                                          | 3   |
| Study selection                    | 9  | State the process for selecting studies (i.e., screening, eligibility, included in systematic review, and, if applicable, included in the meta-analysis).                                              | 3   |
| Data collection process            | 10 | Describe method of data extraction from reports (e.g., piloted forms, independently, in duplicate) and any processes for obtaining and confirming data from investigators.                             | 3   |
| Data items                         | 11 | List and define all variables for which data were sought (e.g., PICOS, funding sources) and any assumptions and simplifications made.                                                                  | 3   |
| Risk of bias in individual studies | 12 | Describe methods used for assessing risk of bias of individual studies (including specification                                                                                                        | N/A |

|                               |    |                                                                                                                                                                 |                              |
|-------------------------------|----|-----------------------------------------------------------------------------------------------------------------------------------------------------------------|------------------------------|
|                               |    | of whether this was done at the study or outcome level), and how this information is to be used in any data synthesis.                                          |                              |
| Summary measures              | 13 | State the principal summary measures (e.g., risk ratio, difference in means).                                                                                   | 3                            |
| Synthesis of results          | 14 | Describe the methods of handling data and combining results of studies, if done, including measures of consistency (e.g., $I^2$ ) for each meta-analysis.       | 3                            |
| Risk of bias across studies   | 15 | Specify any assessment of risk of bias that may affect the cumulative evidence (e.g., publication bias, selective reporting within studies).                    | N/A                          |
| Additional analyses           | 16 | Describe methods of additional analyses (e.g., sensitivity or subgroup analyses, meta-regression), if done, indicating which were pre-specified.                | 3                            |
| <b>RESULTS</b>                |    |                                                                                                                                                                 |                              |
| Study selection               | 17 | Give numbers of studies screened, assessed for eligibility, and included in the review, with reasons for exclusions at each stage, ideally with a flow diagram. | 4, Figure 1                  |
| Study characteristics         | 18 | For each study, present characteristics for which data were extracted (e.g., study size, PICOS, follow-up period) and provide the citations.                    | 4, 5, Table 1, Figure 2      |
| Risk of bias within studies   | 19 | Present data on risk of bias of each study and, if available, any outcome level assessment (see item 12).                                                       | N/A                          |
| Results of individual studies | 20 | For all outcomes considered (benefits or harms), present, for                                                                                                   | 4-6, Tables 1-3, Figures 3-5 |

|                             |    |                                                                                                                                                                                      |              |
|-----------------------------|----|--------------------------------------------------------------------------------------------------------------------------------------------------------------------------------------|--------------|
|                             |    | each study: (a) simple summary data for each intervention group<br>(b) effect estimates and confidence intervals, ideally with a forest plot.                                        |              |
| Synthesis of results        | 21 | Present results of each meta-analysis done, including confidence intervals and measures of consistency.                                                                              | N/A          |
| Risk of bias across studies | 22 | Present results of any assessment of risk of bias across studies (see Item 15).                                                                                                      | N/A          |
| Additional analysis         | 23 | Give results of additional analyses, if done (e.g., sensitivity or subgroup analyses, meta-regression [see Item 16]).                                                                | 11, Figure 5 |
| <b>DISCUSSION</b>           |    |                                                                                                                                                                                      |              |
| Summary of evidence         | 24 | Summarize the main findings including the strength of evidence for each main outcome; consider their relevance to key groups (e.g., healthcare providers, users, and policy makers). | 13, 14       |
| Limitations                 | 25 | Discuss limitations at study and outcome level (e.g., risk of bias), and at review-level (e.g., incomplete retrieval of identified research, reporting bias).                        | 14           |
| Conclusions                 | 26 | Provide a general interpretation of the results in the context of other evidence, and implications for future research.                                                              | 14           |
| <b>FUNDING</b>              |    |                                                                                                                                                                                      |              |
| Funding                     | 27 | Describe sources of funding for the systematic review and other support (e.g., supply of data); role of funders for the systematic review.                                           | N/A          |

N/A: not applicable.
